# Supplementary material
Source: PubMed Central journal article supplement (PMC8639780)
Supplement: NIHMS1741811-supplement-1.pdf [file NIHMS1741811-supplement-1.pdf]

| Radiation Characteristics per Group by Subject                               |        |                                                |                       |              |                |                                                        |                                                 |                                   |                                                                |
|------------------------------------------------------------------------------|--------|------------------------------------------------|-----------------------|--------------|----------------|--------------------------------------------------------|-------------------------------------------------|-----------------------------------|----------------------------------------------------------------|
| Group A<br>(No RT <1<br>year before<br>apheresis),<br>Subject ID:            | Cohort | RT Site                                        | Total<br>Dose<br>(Gy) | Fxns         | Modality       | RT<br>completed<br>before<br>CART<br>infusion,<br>days | RT<br>completed<br>before<br>apheresis,<br>days | Concurrent<br>Systemic<br>Therapy | Last<br>systemic tx<br>before<br>apheresis,<br>infusion        |
| 1 <sup>a</sup>                                                               | 1      | C1: C2 spine<br>C2: T3-5<br>spine, S4<br>spine | 30<br>25              | 10<br>10     | 3DCRT<br>3DCRT | 3477<br>1872                                           | 3452<br>1847                                    | --<br>Bort/Len/<br>Dex            | Pom/Dex,<br>Pom/Dex                                            |
| 2                                                                            | 1      | --                                             | --                    | --           | --             | --                                                     | --                                              |                                   | Carfilz/Len/<br>Dex,<br>Carfilz/Cyclo<br>/Dex                  |
| 7                                                                            | 1      | --                                             | --                    | --           | --             | --                                                     | --                                              |                                   | Carfilz/Pano,<br>Pom/Dex-<br>ACE                               |
| 12                                                                           | 2      | --                                             | --                    | --           | --             | --                                                     | --                                              |                                   | CyBorD,<br>CyBorD                                              |
| 14                                                                           | 2      | --                                             | --                    | --           | --             | --                                                     | --                                              |                                   | Venetoclax,<br>none                                            |
| 17                                                                           | 3      | --                                             | --                    | --           | --             | --                                                     | --                                              |                                   | CPI-610<br>D-AC                                                |
| 19                                                                           | 3      | C1: Total<br>body                              | 2                     | 1            | TBI            | 882                                                    | 821                                             | Mephalan <sup>e</sup>             | Dara/Ixa/<br>Pom/Dex,<br>Dara/Ixa/<br>Pom/Dex                  |
| 20                                                                           | 3      | --                                             | --                    | --           | --             | --                                                     | --                                              |                                   | Carfilz/Cyclo<br>/Pom/Dex,<br>VD-AC                            |
| 21                                                                           | 3      | C1: Right<br>femur                             | 30                    | 10           | 3DCRT          | 880                                                    | 853                                             | --                                | Dara/Pom/<br>Dex,<br>Bort/Pom/<br>Dex                          |
| 22                                                                           | 2      | --                                             | --                    | --           | --             | --                                                     | --                                              |                                   | D-ACE,<br>none                                                 |
| 27                                                                           | 3      | --                                             | --                    | --           | --             | --                                                     | --                                              |                                   | Carfilz/Ve-<br>netoclax/Dex<br><br>Carfilz/Ve-<br>netoclax/Dex |
| 32                                                                           | 3      | --                                             | --                    | --           | --             | --                                                     | --                                              |                                   | Carfilz/Cyclo<br>/Dex<br>Carfilz/Cyclo<br>/Dex                 |
| 34                                                                           | 3      | --                                             | --                    | --           | --             | --                                                     | --                                              |                                   | Carfilz/Pom/<br>Dex,<br>VD-PACE                                |
| Median<br>(range)                                                            |        |                                                | 27.5<br>(2-30)        | 10<br>(1-10) |                | 1778<br>(880-3477)                                     | 1743<br>(853-3452)                              |                                   |                                                                |
| <b>Group B<br/>(RT &lt;1<br/>year before<br/>apheresis),<br/>Subject ID:</b> |        |                                                |                       |              |                |                                                        |                                                 |                                   |                                                                |
| 3 <sup>a</sup>                                                               | 1      | C1: Right<br>orbit                             | 30                    | 10           | 3DCRT          | 112                                                    | 63                                              | Carfilz/Pom/<br>Dex               | D-PACE,<br>D-AC                                                |
| 8                                                                            | 1      | C5: Left<br>maxillary<br>sinus                 | 30                    | 10           | IMRT           | 206                                                    | 181                                             | Pom/Cyclo/<br>Dex                 | Carfilz/Pom/<br>Dex,<br>Carfilz/Pom/<br>Dex                    |

|                                                       |               |                              |                                |              |                 |                                                                    |                                                         |                          |                                                       |
|-------------------------------------------------------|---------------|------------------------------|--------------------------------|--------------|-----------------|--------------------------------------------------------------------|---------------------------------------------------------|--------------------------|-------------------------------------------------------|
| 9                                                     | 1             | C1: Sternum                  | 8                              | 1            | Electrons       | 40                                                                 | 15                                                      | --                       | Dara,<br>Pulse Dex                                    |
| 10                                                    | 1             | C1: Right femur              | 30                             | 10           | 3DCRT           | 81                                                                 | 53                                                      | Pom/Dex                  | Pom/Dex,<br>Pom/Cyclo/<br>Dex +<br>plasma<br>exchange |
| 11                                                    | 1             | C1: T10-12 spine             | 40                             | 20           | 3DCRT           | 301                                                                | 268                                                     | --                       | VDT-PACE,<br>VDT-PACE                                 |
| 15 <sup>a</sup>                                       | 1             | C1: Right ribs,<br>left ribs | 20                             | 10           | Electrons       | 115                                                                | 90                                                      | Pembro/Dex               | Pembro/Pom<br>/Dex,<br>Pom/Dex                        |
| 29                                                    | 3             | C2: Mandible                 | 18                             | 9            | 3DCRT           | 125                                                                | 96                                                      | --                       | VDT-PACE,<br>none                                     |
| 33 <sup>b</sup>                                       | 3             | C2: Right thigh              | 6                              | 2            | 3DCRT           | 67                                                                 | 28                                                      | --                       | Pembro/Len/<br>Dex,<br>none                           |
| Median<br>(Range)                                     |               |                              | 25<br>(6-40)                   | 10<br>(1-10) |                 | 114<br>(40-301)                                                    | 77<br>(15-268)                                          |                          |                                                       |
| <b>Group C<br/>(Bridging<br/>RT),<br/>Subject ID:</b> | <b>Cohort</b> | <b>RT Site</b>               | <b>Total<br/>Dose<br/>(Gy)</b> | <b>Fxns</b>  | <b>Modality</b> | <b>RT<br/>completed<br/>before<br/>CART<br/>infusion,<br/>days</b> | <b>RT<br/>started<br/>after<br/>apheresis,<br/>days</b> |                          |                                                       |
| 13                                                    | 2             | C1: Skull Base               | 20                             | 5            | 3DCRT           | 31                                                                 | 22                                                      | --                       | Salvage<br>ASCT,<br>VD-CE                             |
| 16                                                    | 2             | C2: T7-L1 spine              | 8                              | 1            | 3DCRT           | 18                                                                 | 15                                                      | --                       | D-CE                                                  |
| 23                                                    | 3             | C3: Bilateral hips           | 24                             | 6            | 3DCRT           | 35                                                                 | 21                                                      | VD-PCE                   | Carfilz/Pom/<br>Dex/Nelfin,<br>VD-PCE                 |
| 25 <sup>a</sup>                                       | 3             | C3: Bilateral orbits         | 30                             | 10           | 3DCRT           | 19                                                                 | 16                                                      | Bort/Veneto-<br>clax/Dex | Selinexor/<br>Dex,<br>Bort/Veneto-<br>clax/Dex        |
| Median<br>(Range)                                     |               |                              | 22<br>(8-30)                   | 6<br>(1-10)  |                 | 25<br>(18-35)                                                      | 19<br>(15-22)                                           |                          |                                                       |

**Supplemental Table 1: Radiation characteristics of Group A (n=13), B (n=8), and C (n=4).** Site of treatment, dose, fractions, radiation modality, and timing of radiation is listed above for each subject. Median dose, fractions, and number of days radiation is completed before CART-BCMA infusion are listed above for each group. Bridging RT is defined as radiation received after apheresis and before CART-infusion.

<sup>a</sup> Subjects 01, 03, 15, and 25 received only 40% of planned dose due to fevers/early CRS.

<sup>b</sup> Subject 33 was originally planned for 30 Gy in 10 fractions but RT course was stopped early at 6 Gy due to T cell harvest.

<sup>c</sup> Subject 19 underwent high dose melphalan and low-dose TBI conditioning followed by autologous stem cell transplant.

--, not applicable; Fxns, fractions; Tx, treatment; RT, radiation therapy; 3DCRT, 3D conformal radiation therapy; IMRT, intensity modulated radiotherapy; TBI, total body irradiation; Bort, bortezomib; Len, lenalidomide; Pom, pomalidomide; Carfilz, carfilzomib; Cyclo, cyclophosphamide; CPI-610, investigational BET inhibitor; CyBorD = cyclophosphamide, bortezomib, dexamethasone; D-AC = dexamethasone + doxorubicin and cyclophosphamide; D-ACE = dexamethasone + doxorubicin, cyclophosphamide, and etoposide; D-CE = dexamethasone + cyclophosphamide and etoposide; D-PACE = dexamethasone + cisplatin, doxorubicin, cyclophosphamide, and etoposide; Dara, daratumumab; Dex, dexamethasone; Nelfin, nelfinavir; Pano, panobinostat; Pembro, pembrolizumab; Pom/Dex-ACE = pomalidomide, dexamethasone + infusional doxorubicin, cyclophosphamide, and etoposide; VD-AC = bortezomib, dexamethasone + doxorubicin and cyclophosphamide; VD-CE = bortezomib, dexamethasone + cyclophosphamide and etoposide; VD-PCE = bortezomib, dexamethasone + cisplatin, cyclophosphamide, etoposide; VDT-PACE = bortezomib, dexamethasone, thalidomide + cisplatin, doxorubicin, cyclophosphamide, and etoposide.

| CART Manufacturing Details         |                                                           |                                                       |                                       |               |                                                             |                                                       |                                       |                                                            |                                                     |         |
|------------------------------------|-----------------------------------------------------------|-------------------------------------------------------|---------------------------------------|---------------|-------------------------------------------------------------|-------------------------------------------------------|---------------------------------------|------------------------------------------------------------|-----------------------------------------------------|---------|
| Group:                             | A (no RT <1 year before apheresis); n=13<br>Median (IQR): | B (RT <1 year before apheresis); n=8<br>Median (IQR): | C (Bridging RT); n=4<br>Median (IQR): | P value       | A+C (no RT <1 year before apheresis); n=17<br>Median (IQR): | B (RT <1 year before apheresis); n=8<br>Median (IQR): | P value                               | No RT/RT <100 days before apheresis, n=19<br>Median (IQR): | RT <100 days before apheresis; n=6<br>Median (IQR): | P value |
| ALC pre-apheresis (x10e3/μL)       | 0.80 (0.59-1.03)                                          | 0.65 (0.46-0.95)                                      | 1.00 (0.45-1.38)                      | 0.46          | 0.95 (0.59-1.03)                                            | 0.65 (0.46-0.95)                                      | 0.26                                  | 0.80 (0.50-1.00)                                           | 0.80 (0.41-1.20)                                    | 0.72    |
| % Lymphocytes                      | 25.0 (19.1-32.5)                                          | 20.8 (15.0-29.1)                                      | 21.7 (10.2-30.9)                      | 0.59          | 24.4 (18.3-32.5)                                            | 20.8 (15.0-29.1)                                      | 0.51                                  | 21.9 (16.5-31.9)                                           | 22.8 (17.7-32.1)                                    | 0.88    |
| CD3% in seed culture               | 70 (62.9-84.0)                                            | 52.9 (23.5-86.0)                                      | 70.6 (55.5-74.0)                      | 0.62          | 70.0 (62.9-81.8)                                            | 52.9 (23.5-86.0)                                      | 0.37                                  | 69.2 (52.6-80.0)                                           | 71.0 (42.9-87.8)                                    | 0.78    |
| CD4:CD8 in seed culture            | 0.81 (0.46-1.35)                                          | 0.76 (0.37-2.12)                                      | 0.52 (0.44-0.93)                      | 0.76          | 0.70 (0.46-1.15)                                            | 0.76 (0.37-2.12)                                      | 0.90                                  | 0.70 (0.46-1.06)                                           | 0.89 (0.45-2.58)                                    | 0.43    |
| CD3% at harvest                    | 97.4 (95.6-98.4)                                          | 96.3 (91.9-96.9)                                      | 97.9 (90.0-98.8)                      | 0.18          | 97.6 (95.6-98.4)                                            | 96.3 (91.9-96.9)                                      | 0.068                                 | 97.4 (94.9-98.4)                                           | 96.3 (90.7-96.9)                                    | 0.14    |
| CD4/CD8 at harvest                 | 2.09 (1.50-2.82)                                          | 1.71 (1.26-2.69)                                      | 1.20 (0.86-1.66)                      | 0.098         | 1.87 (1.35-2.31)                                            | 1.71 (1.26-2.69)                                      | 0.81                                  | 1.87 (1.31-2.40)                                           | 1.71 (1.30-2.47)                                    | 0.84    |
| % CD45RO-CD27+ of CD8+ T cells     | 27.0 (15.7-34.6)                                          | 19.2 (10.4-42.3)                                      | 30.8 (22.4-34.6)                      | 0.78          | 28.9 (19.4-34.4)                                            | 19.2 (10.4-42.3)                                      | 0.76                                  | 27.0 (18.7-33.5)                                           | 28.1 (7.4-46.4)                                     | 0.84    |
| Fold Expansion                     | 38.9 (27.2-47.6)                                          | 14.7 (9.0-22.9)                                       | 27.2 (16.4-41.5)                      | <b>0.0065</b> | 32.3 (24.4-45.5)                                            | 14.7 (9.0-22.9)                                       | <b>0.0015</b>                         | 31.7 (16.8-45.1)                                           | 20.3 (11.1-25.0)                                    | 0.069   |
| Transduction Efficiency (%)        | 14.7 (9.3-23.0)                                           | 20.8 (10.6-25.1)                                      | 16.5 (10.8-23.6)                      | 0.68          | 14.7 (10.2-23.1)                                            | 20.8 (10.6-25.1)                                      | 0.43                                  | 15.0 (10.7-22.7)                                           | 19.4 (8.5-27.8)                                     | 0.72    |
| Peripheral Blood at Peak Expansion |                                                           |                                                       |                                       |               |                                                             |                                                       |                                       |                                                            |                                                     |         |
| Group:                             | A (no RT <1 year before apheresis); n=13<br>Median (IQR): | B (RT <1 year before apheresis); n=8<br>Median (IQR): | C (Bridging RT); n=4<br>Median (IQR): | P value       | No RT/RT <100 days before apheresis, n=15<br>Median (IQR):  | RT <100 days before apheresis; n=6<br>Median (IQR):   | C (Bridging RT); n=4<br>Median (IQR): | P value                                                    |                                                     |         |
| #CAR+ given (x10 <sup>8</sup> )    | 5.0 (1.3-5.0) <sup>c</sup>                                | 4.3 (2.0-5.0) <sup>c</sup>                            | 1.3 (0.5-4.3) <sup>c</sup>            | 0.29          | 5.0 (2.0-5.0) <sup>c</sup>                                  | 3.5 (1.9-5.0) <sup>c</sup>                            | 1.3 (0.5-2.0) <sup>c</sup>            | 0.28                                                       |                                                     |         |
| Day of Peak                        | 10.0 (9.0-13.0) <sup>b</sup>                              | 11.0 (8.5-15.5)                                       | 11.5 (10.0-13.8)                      | 0.58          | 10.0 (9.0-14.3) <sup>b</sup>                                | 11.0 (9.3-18.0) <sup>a</sup>                          | 12 (10-14)                            | 0.58                                                       |                                                     |         |
| %CAR+ of CD3+                      | 19.1 (5.2-41.2) <sup>b</sup>                              | 18.2 (4.1-41.8)                                       | 11.1 (5.9 (38.8)                      | 0.95          | 17.1 (6.9-37.9) <sup>b</sup>                                | 18.7 (3.6-50.4) <sup>a</sup>                          | 11.1 (5.1-47.1)                       | 0.95                                                       |                                                     |         |
| %CAR+ of CD4+                      | 6.7 (1.9-9.1) <sup>b</sup>                                | 6.3 (0.4-14.6)                                        | 5.2 (3.1-10.7)                        | 0.99          | 6.7 (1.3-9.5) <sup>b</sup>                                  | 4.6 (0.3-17.7) <sup>a</sup>                           | 5.2 (2.9-12.1)                        | 0.91                                                       |                                                     |         |
| %CAR+ of CD8+                      | 23.7 (9.0-47.1) <sup>b</sup>                              | 25.2 (15.0-51.0)                                      | 15.3 (7.7-42.1)                       | 0.82          | 22.3 (9.8-46.6) <sup>b</sup>                                | 31.9 (11.8-59.7) <sup>a</sup>                         | 15.3 (5.9-50.3)                       | 0.83                                                       |                                                     |         |
| %HLA-DR+ of CAR+                   | 94.5 (87.3-97.0) <sup>b</sup>                             | 94.0 (77.0-96.0)                                      | 92.5 (86.8-96.8)                      | 0.85          | 94.5 (87.8-97.0) <sup>b</sup>                               | 93.0 (63.0-96.3) <sup>a</sup>                         | 92.5 (85.0-98.0)                      | 0.81                                                       |                                                     |         |

**Supplemental Table 2: Characteristics of CART-BCMA manufacturing and CART BCMA cells in peripheral blood at peak expansion in Group A, B, and C and in those receiving radiation within 100 days preceding apheresis.** The frequency of total CD3+, CD3+CD4+, CD3+CD8+ cells was assessed by flow cytometry at the beginning of manufacturing (“in seed culture”) and at the end of manufacturing (“at harvest”). CART-BCMA cells were quantified by flow cytometry. The frequency of CAR+ cells within CD3+, CD4+, and CD8+ populations and activation status at peak expansion (as measured by % of CAR+ cells expressing HLA-DR) was also assessed. Median value, interquartile range (IQR), and exact p-value, derived from either Wilcoxon rank sum test or Kruskal-Wallis test, for each variable are reported.

<sup>a</sup> The peak expansion of subject 9 in Group B was determined by qPCR since CAR+ cells were not detectable by flow cytometry.

<sup>b</sup> The peak for subject 34 in Group A could not be determined due to lack of sample between days 10-21.

<sup>c</sup> Subjects 1 (Group A), 3 (Group B), 15 (Group B), and 25 (Group C) received 40% of planned CART-BCMA dose due to early cytokine release syndrome. CD4:CD8 in seed culture, ratio of CD4+ to CD8+ T-cells in pre-manufacturing leukapheresis product; CD4/CD8 in harvest, ratio of CD4+ to CD8+ T-cells in manufactured product.

| <b>Radiation Characteristics received post CAR-T cell infusion</b> |       |                                  |                 |               |           |                                              |
|--------------------------------------------------------------------|-------|----------------------------------|-----------------|---------------|-----------|----------------------------------------------|
| Subject                                                            | Group | Course no: RT site               | Total Dose (Gy) | Fxns          | Modality  | Radiation started after CAR-T infusion, days |
| 12                                                                 | A     | C1: Skull base, left rib         | 30              | 10            | 3DCRT     | 50                                           |
|                                                                    |       | C2: Right knee, right hip        | 8               | 1             | 3DCRT     | 291                                          |
|                                                                    |       | C3: Left knee, left hip          | 8               | 1             | 3DCRT     | 294                                          |
|                                                                    |       | C4: bilateral humeri             | 8               | 1             | 3DCRT     | 303                                          |
| 32                                                                 | A     | C1: Skull base, bilateral orbits | 20              | 10            | 3DCRT     | 490                                          |
|                                                                    |       | C2: L3-S2 spine                  | 20              | 10            | 3DCRT     | 500                                          |
| 34                                                                 | A     | C1: Total Body                   | 9               | 6             | TBI       | 306                                          |
| 3                                                                  | B     | C2: Right rib                    | 8               | 2             | 3DCRT     | 198                                          |
| 10                                                                 | B     | C2: Bilateral femurs             | 30              | 15            | 3DCRT     | 212                                          |
|                                                                    |       | C3: T6-T8 spine                  | 30              | 15            | 3DCRT     | 503                                          |
|                                                                    |       | C4: Chest wall                   | 8               | 1             | 3DCRT     | 1233                                         |
| 11                                                                 | B     | C2: Right humerus, right femur   | 30              | 10            | 3DCRT     | 217                                          |
|                                                                    |       | C3: Right humerus                | 30              | 10            | 3DCRT     | 403                                          |
|                                                                    |       | C4: T4-T9 Spine                  | 20              | 5             | 3DCRT     | 438                                          |
|                                                                    |       | C5: Left femur                   | 30              | 10            | 3DCRT     | 534                                          |
|                                                                    |       | C6: Left humerus                 | 20              | 5             | 3DCRT     | 584                                          |
|                                                                    |       | C7: Right femur                  | 20              | 5             | 3DCRT     | 680                                          |
|                                                                    |       | C8: T9-T12 spine                 | 16              | 4             | 3DCRT     | 730                                          |
|                                                                    |       | 29                               | B               | C2: Left hip, | 15        | 5                                            |
| C3: T5-10 spine,                                                   | 22    |                                  |                 | 10            | 3DCRT     | 87                                           |
| C2-T1 spine,                                                       | 26    |                                  |                 | 13            | 3DCRT     | 84                                           |
| Right rib                                                          | 24    |                                  |                 | 8             | Electrons | 81                                           |
| 23                                                                 | C     | C4: Sacrum, Left mastoid         | 20              | 5             | 3DCRT     | 73                                           |
|                                                                    |       | C5: Right ribs, left ribs        | 20              | 5             | 3DCRT     | 122                                          |
|                                                                    |       | C6: Left femur, right ilium      | 16              | 4             | 3DCRT     | 128                                          |
|                                                                    |       | C7: Left ribs                    | 20              | 5             | 3DCRT     | 253                                          |
|                                                                    |       | C8: Left ribs,                   | 16              | 4             | 3DCRT     | 253                                          |
|                                                                    |       | T8-T11 spine                     | 8               | 1             | 3DCRT     | 301                                          |
|                                                                    |       |                                  |                 |               | 8         | 1                                            |

**Supplemental Table 3: Details of radiation received after CART-BCMA therapy.** Site of treatment, dose, fractions, radiation modality, and number of days until radiation is started post-CART infusion are listed for each subject.

Fxns, fractions; RT, radiation; 3DCRT, 3D conformal radiation therapy; IMRT, intensity modulated radiotherapy; TBI, total body irradiation; Group A, no RT within 1 year before apheresis (n=13); Group B, RT within 1 year before apheresis (n=8); Group C, bridging-RT defined as RT delivered after apheresis but before CART infusion (n=4).

**A)**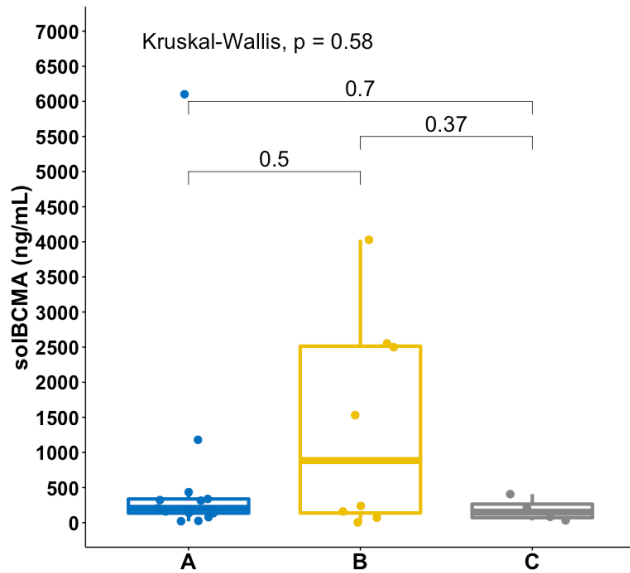**B)**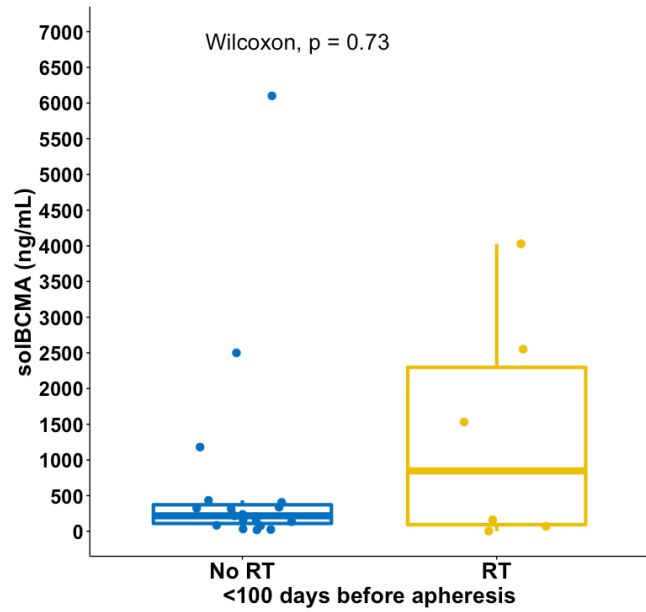

**Supplemental Figure 1: Soluble BCMA(solBCMA) serum levels before cyclophosphamide lymphodepletion on D-3. A)** Peripheral blood serum concentration of solBCMA between D-7 to D-3\* was similar between Group A (No RT within 1 year before apheresis), B (RT within 1 year before apheresis), and C (bridging-RT) (median 204, 885, and 151 ng/mL,  $p=0.58$ , Kruskal-Wallis test). **B)** Peripheral blood serum concentration of solBCMA between D-7 to D-3\* was similar between subjects who did and did not receive RT within 100 days prior to apheresis (median 846 and 217 ng/mL,  $p=0.73$ , Wilcoxon rank-sum test). \*SolBCMA concentration for all subjects were measured at D-7 to D-3 using ELISA except for cohort 1 subjects whose solBCMA level was measured at either D-7 to D-3 or D0 pre-CART infusion since cohort 1 did not receive lymphodepletion. RT, radiation therapy.

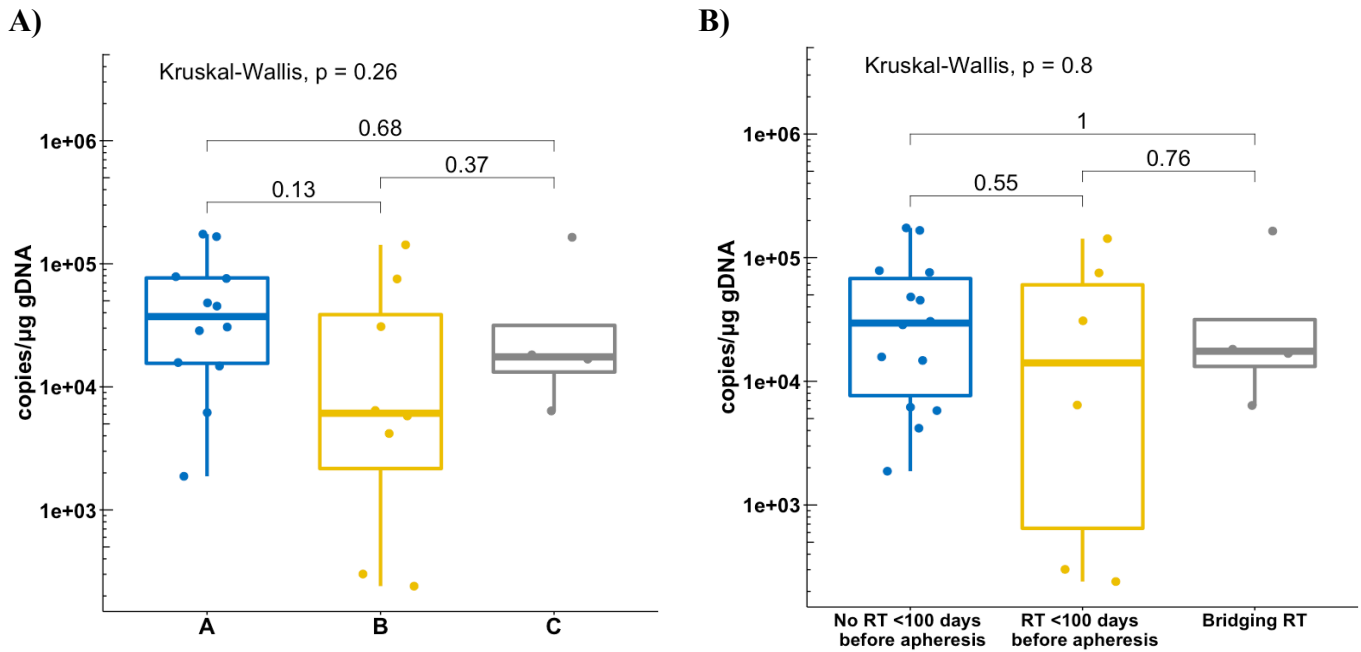

**Supplemental Figure 2: Prior radiation exposure was not associated with the level of CART-BCMA cells in peripheral blood at peak expansion. A)** CAR transgene copy number, measured by qPCR, was not significantly different between Groups A (No RT within 1 year before apheresis), B (RT within 1 year before apheresis), and C (bridging-RT) (median 37946, 6109, and 17528 copies/ $\mu$ g DNA,  $p=0.26$ , Kruskal-Wallis test) at peak expansion in peripheral blood. **B)** CAR transgene copy number was not significantly different between subjects who received no RT within 100 days before apheresis, RT within 100 days before apheresis, and bridging-RT (median 29609, 18661, and 17528 copies/ $\mu$ g DNA,  $p=0.80$ , Kruskal-Wallis test). qPCR data was not available for subject 34 in Group A. gDNA, genomic DNA; RT, radiation therapy.

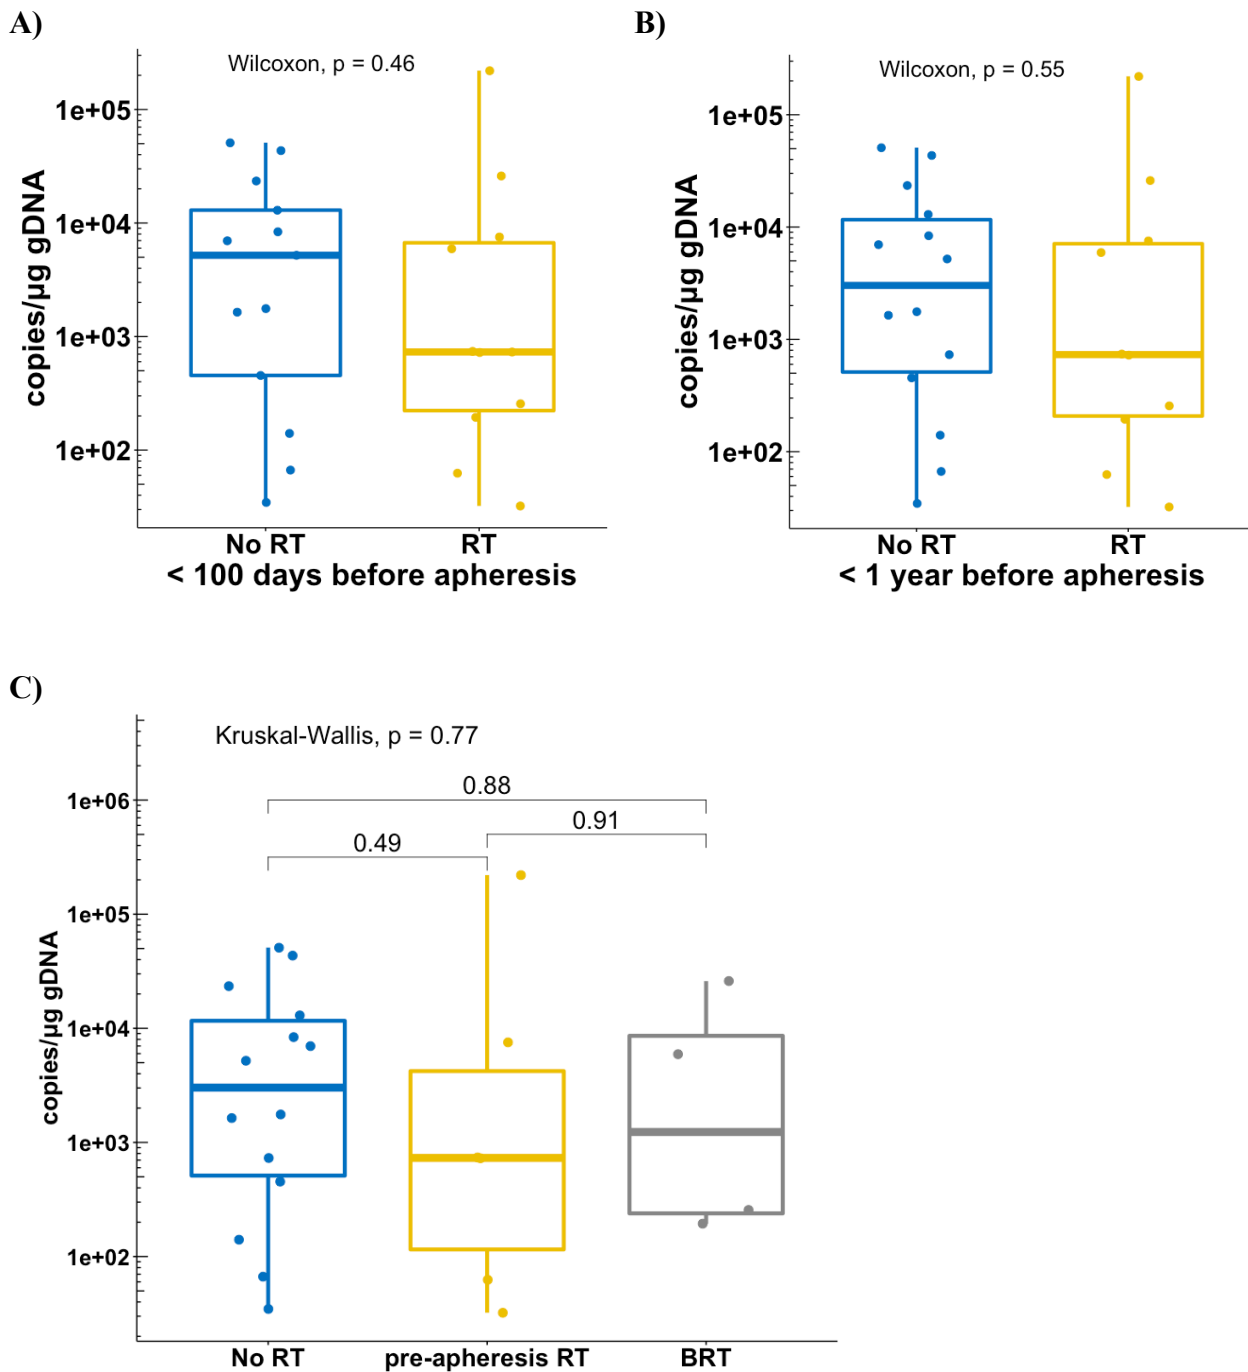

**Supplemental Figure 3: RT was not associated with the level of persistent CART-BCMA cells in peripheral blood at Day 28.** **A)** Median CAR transgene copies/ $\mu$ g genomic DNA, representing CART-BCMA cell levels, did not significantly differ between No RT (5199) and RT (731) ( $p=0.46$ , Wilcoxon rank sum test). RT group ( $n=11$ ) included subjects who received either bridging RT or RT within 1 year before apheresis; No RT group ( $n=13$ ) included subjects with no history of RT or remote RT completed  $>1$  year before apheresis. **B)** RT delivered within 100 days before apheresis up to CART infusion ( $n=10$ ) did not significantly change expansion compared to no/remote RT ( $n=14$ ) (median 732 vs. 3478 copies/ $\mu$ g DNA,  $p=0.55$ ) **C)** Level of persistent CART-BCMA cells was not significantly different between subjects who received bridging RT ( $n=4$ ), RT  $<100$  days before apheresis ( $n=6$ ), or no/remote RT ( $n=14$ ) (median 3102, 732, and 3478 copies/ $\mu$ g DNA,  $p=0.55$ , Kruskal-Wallis test). qPCR data was not available for subject 8 in Group B. RT, radiation therapy; BRT, bridging-RT; gDNA, genomic DNA.



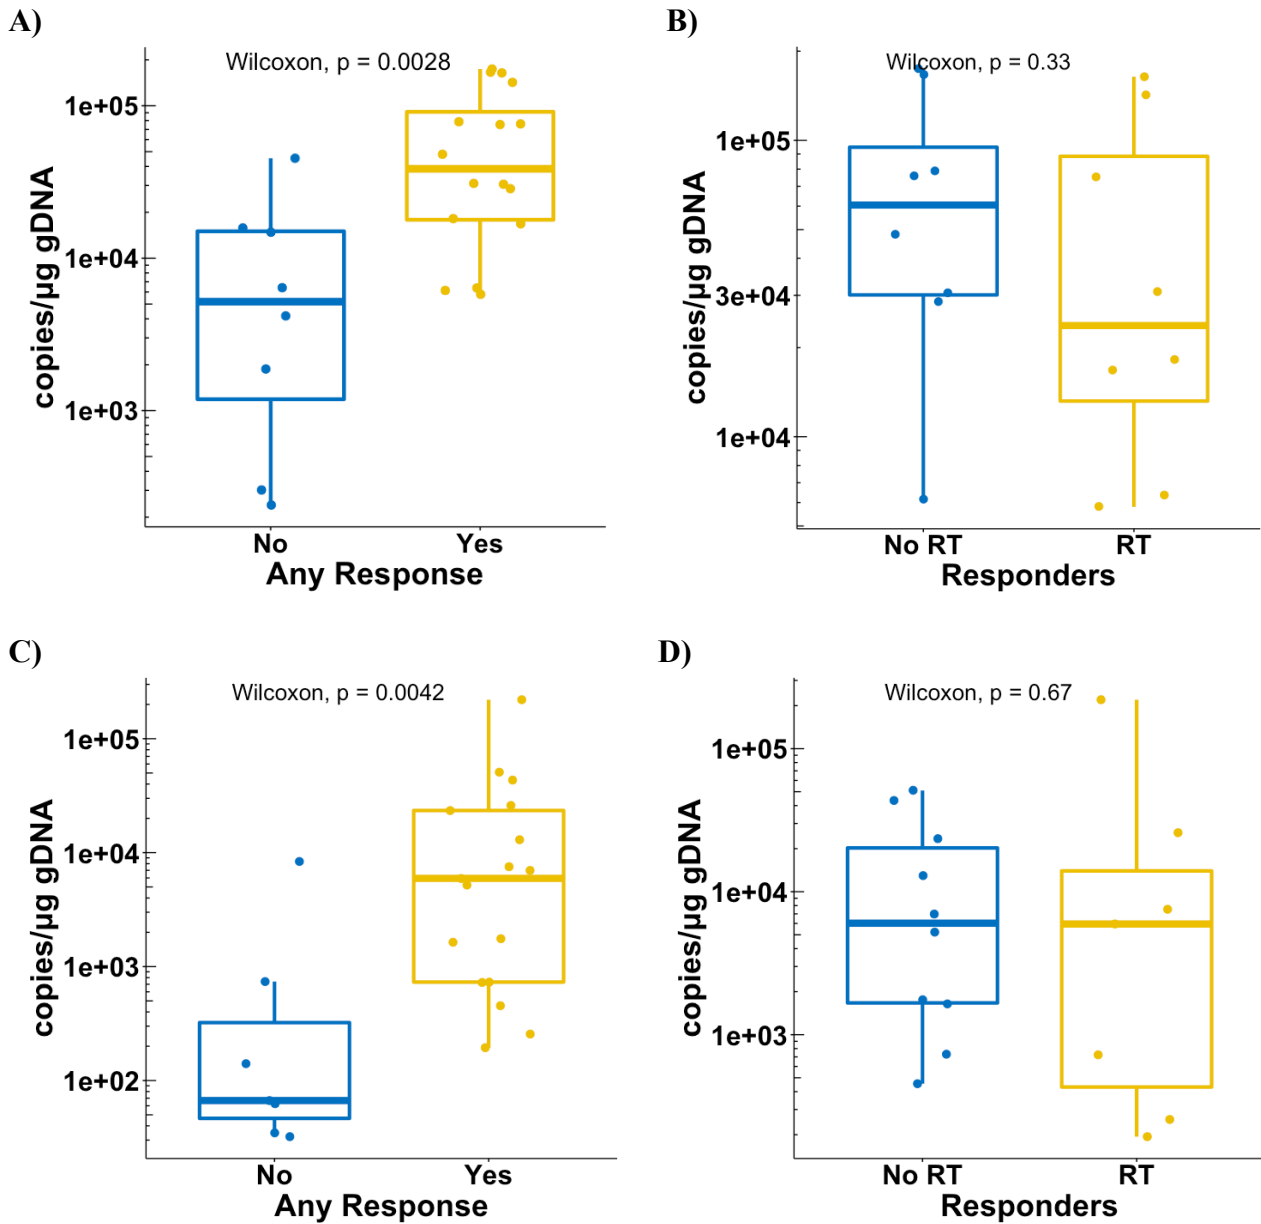

**Supplemental Figure 4: Assessment of previously identified predictors of response and in vivo CART-BCMA cell levels relative to RT receipt.** Quantity of CART-BCMA cells, measured by qPCR, in peripheral blood at peak expansion (A) and Day 28 post-CART infusion (C) correlated with any clinical response ( $\geq$ MR) ( $p=0.003$  for peak expansion,  $p=0.004$  for D28, Wilcoxon rank sum test). Within responders ( $\geq$ MR), subjects who received RT within 1 year before apheresis up to CART infusion vs. subjects who received no RT/RT outside this window had comparable levels of CART BCMA cells at peak expansion (B) ( $p=0.33$ ) and at D28 ( $p=0.67$ ) (D). qPCR data was not available for subject 8 in Group B. RT, radiation therapy; gDNA, genomic DNA.
